# Supplementary material for: Development of the Inner City attitudinal assessment tool (ICAAT) for learners across Health care professions
Source: Springer Nature journal article supplement (doi:10.1186/s12913-020-5000-6), 2020-03-06
Supplement: MOESM1 [file 17778082]

Additional File 1: Search strategy to identify tools used to measure attitudes to inner city populations.

- (1) exp Homeless Persons/ or exp "Transients and Migrants"/ or ((vulnerable or migrant or transient\*) adj2 (people or person\* or individual\* or child\* or youth\* or population\* or worker\* or men or women or man or woman)).mp. or (street adj2 (people or person\* or individual\* or youth\* or population\* or child\* or men or women or man or woman)).mp. or ("lack of housing" or substandard housing or unstably housed or underhoused or squatter\* or homeless\*.mp. or homeless\* or vagrant\* or indigent).mp. or (marginal\* adj2 (population\* or people\* or group\* or hous\*)).mp.
- (2) exp poverty area/ or (slum or slums or ghetto\* or barrio or barrios or inner city or downtown core or urban core or city core or skid row).mp. [mp=title, abstract, original title, name of substance word, subject heading word, keyword heading word, protocol supplementary concept, rare disease supplementary concept, unique identifier]
- (3) exp Prisoners/ or prisoner\*.mp. or inmate\*.mp. [mp=title, abstract, original title, name of substance word, subject heading word, keyword heading word, protocol supplementary concept, rare disease supplementary concept, unique identifier]
- (4) drug users/
- (5) poverty/ or poverty.mp. or prostitut\*.mp. or prostitution/ [mp=title, abstract, original title, name of substance word, subject heading word, keyword heading word, protocol supplementary concept, rare disease supplementary concept, unique identifier]
- (6) (low\* adj7 ((socioeconomic\* or socio economic\*) adj1 (status or class or position\*))).ti.
- (7) substance-related disorders/ or alcohol-related disorders/ or alcohol-induced disorders/

or alcoholic intoxication/ or alcoholism/ or binge drinking/ or amphetamine-related disorders/ or cocaine-related disorders/ or drug overdose/ or inhalant abuse/ or marijuana abuse/ or exp opioid-related disorders/ or psychoses, substance-induced/ or substance abuse, intravenous/ or substance withdrawal syndrome/ or exp alcohol withdrawal delirium/

- (8) exp Homeless Persons/ or exp "Transients and Migrants"/ or ((vulnerable or migrant or transient\*) adj2 (people or person\* or individual\* or child\* or youth\* or population\* or worker\* or men or women or man or woman)).mp. or (street adj2 (people or person\* or individual\* or youth\* or population\* or child\* or men or women or man or woman)).mp. or ("lack of housing" or substandard housing or unstably housed or underhoused or squatter\* or homeless\*.mp. or homeless\* or vagrant\* or indigent).mp. or (marginal\* adj2 (population\* or people\* or group\* or hous\*)).mp.
- (9) exp poverty area/ or (slum or slums or ghetto\* or barrio or barrios or inner city or downtown core or urban core or city core or skid row).mp. [mp=title, abstract, original title, name of substance word, subject heading word, keyword heading word, protocol supplementary concept, rare disease supplementary concept, unique identifier]
- (10) exp Prisoners/ or prisoner\*.mp. or inmate\*.mp. [mp=title, abstract, original title, name of substance word, subject heading word, keyword heading word, protocol supplementary concept, rare disease supplementary concept, unique identifier]
- (11) drug users/
- (12) poverty/ or poverty.mp. or prostitut\*.mp. or prostitution/ [mp=title, abstract, original title, name of substance word, subject heading word, keyword heading word, protocol

supplementary concept, rare disease supplementary concept, unique identifier]

(13) (low\* adj7 ((socioeconomic\* or socio economic\*) adj1 (status or class or position\*))).ti.

(14) substance-related disorders/ or alcohol-related disorders/ or alcohol-induced disorders/ or alcoholic intoxication/ or alcoholism/ or binge drinking/ or amphetamine-related disorders/ or cocaine-related disorders/ or drug overdose/ or inhalant abuse/ or marijuana abuse/ or exp opioid-related disorders/ or psychoses, substance-induced/ or substance abuse, intravenous/ or substance withdrawal syndrome/ or exp alcohol withdrawal delirium/

(15) exp Homeless Persons/ or exp "Transients and Migrants"/ or ((vulnerable or migrant or transient\*) adj2 (people or person\* or individual\* or child\* or youth\* or population\* or worker\* or men or women or man or woman)).mp. or (street adj2 (people or person\* or individual\* or youth\* or population\* or child\* or men or women or man or woman)).mp. or ("lack of housing" or substandard housing or unstably housed or underhoused or squatter\* or homeless\*.mp. or homeless\* or vagrant\* or indigent).mp. or (marginal\* adj2 (population\* or people\* or group\* or hous\*)).mp.

(16) exp poverty area/ or (slum or slums or ghetto\* or barrio or barrios or inner city or downtown core or urban core or city core or skid row).mp. [mp=title, abstract, original title, name of substance word, subject heading word, keyword heading word, protocol supplementary concept, rare disease supplementary concept, unique identifier]

(17) exp Prisoners/ or prisoner\*.mp. or inmate\*.mp. [mp=title, abstract, original title, name of substance word, subject heading word, keyword heading word, protocol supplementary concept, rare disease supplementary concept, unique identifier]

- (18) drug users/
- (19) poverty/ or poverty.mp. or prostitut\*.mp. or prostitution/ [mp=title, abstract, original title, name of substance word, subject heading word, keyword heading word, protocol supplementary concept, rare disease supplementary concept, unique identifier]
- (20) (low\* adj7 ((socioeconomic\* or socio economic\*) adj1 (status or class or position\*))).ti.
- (21) substance-related disorders/ or alcohol-related disorders/ or alcohol-induced disorders/ or alcoholic intoxication/ or alcoholism/ or binge drinking/ or amphetamine-related disorders/ or cocaine-related disorders/ or drug overdose/ or inhalant abuse/ or marijuana abuse/ or exp opioid-related disorders/ or psychoses, substance-induced/ or substance abuse, intravenous/ or substance withdrawal syndrome/ or exp alcohol withdrawal delirium/
- (22) (substance abuse\* or substance misuse\* or substance dependence or substance use\*).ti,ab.
- (23) (drug abuse\* or drug addict\* or drug use\* or drug dependence or idu).ti.
- (24) (alcoholic\* or alcoholism\* or alcohol use\* or alcohol abuse\* or alcohol misuse\*).ti.
- (25) (heroin use\* or heroin dependence or heroin addict\*).ti.
- (26) (cocaine use\* or cocaine dependence or cocaine addict\*).ti.
- (27) (illicit drug use\* or intravenous drug use\* or iv drug use\* or parenteral drug use\* or injection drug use\*).ti.
- (28) 18 or 19 or 20 or 21 or 22 or 23 or 24 or 25 or 26 or 27 or 28 or 29 or 30
- (29) (attitud\* or learner comfort).ti.
- (30) ((attitud\* or learner comfort) adj5 (assess\* or test\* or evaluate\* or questionnaire\* or

tool\*)).tw.

(31) exp "Attitude of Health Personnel"/ or attitudes of health personnel.mp.

(32) 32 or 33 or 34

(33) 31 and 35

(34) exp emergency responders/ or health personnel/ or exp allied health personnel/ or exp dental staff/ or exp dentists/ or faculty, dental/ or faculty, medical/ or faculty, nursing/ or health educators/ or exp medical staff/ or exp nurses/ or exp nursing staff/ or exp personnel, hospital/ or pharmacists/ or exp physicians/ or exp students, health occupations/

(35) (social worker\* or sociologist\* or case worker\* or counsellor\* or psychologist\* or police).tw.

(36) 37 or 38

(37) 36 and 39
